# Supplementary material for: Cell-permeable organic fluorescent probes for live-cell long-term super-resolution imaging reveal lysosome-mitochondrion interactions
Source: PubMed Central journal article supplement (PMC5670236; doi:10.1038/s41467-017-01503-6), 2017-11-03
Supplement: 41467_2017_1503_MOESM1_ESM.pdf [file 41467_2017_1503_MOESM1_ESM.pdf]

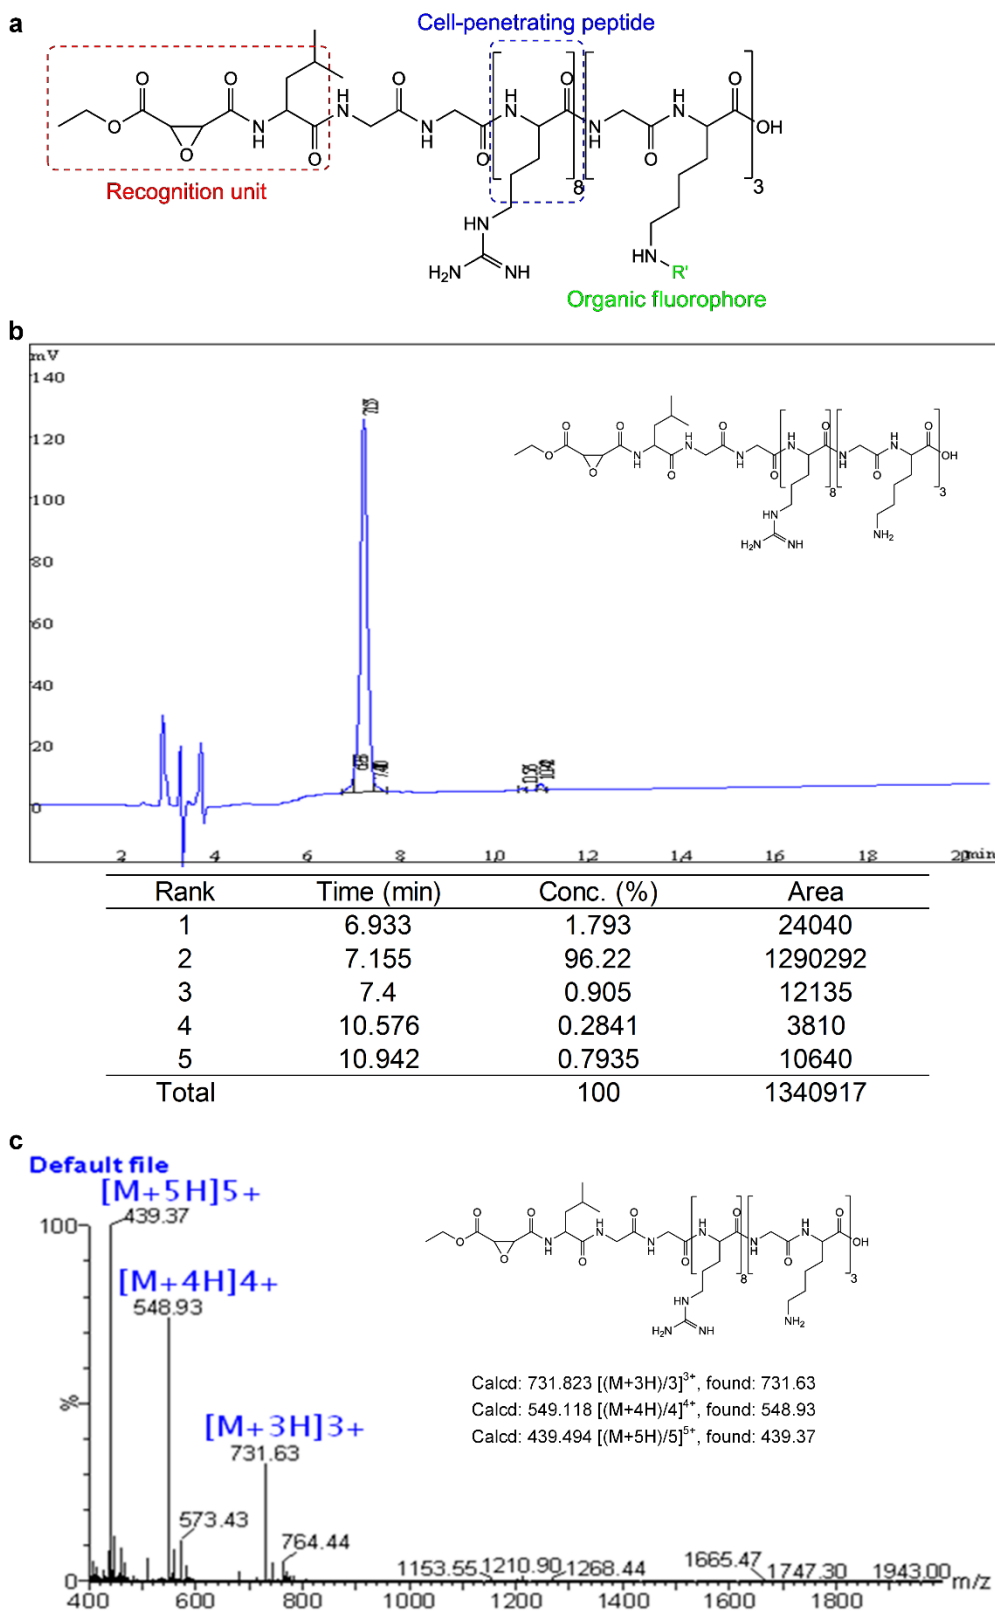

**Supplementary Figure 1.** (a) Structures of the lysosomal probes. (b) HPLC analysis of the peptide part of the lysosomal probes. (c) ESI mass spectrum analysis of the peptide part of the lysosomal probes.

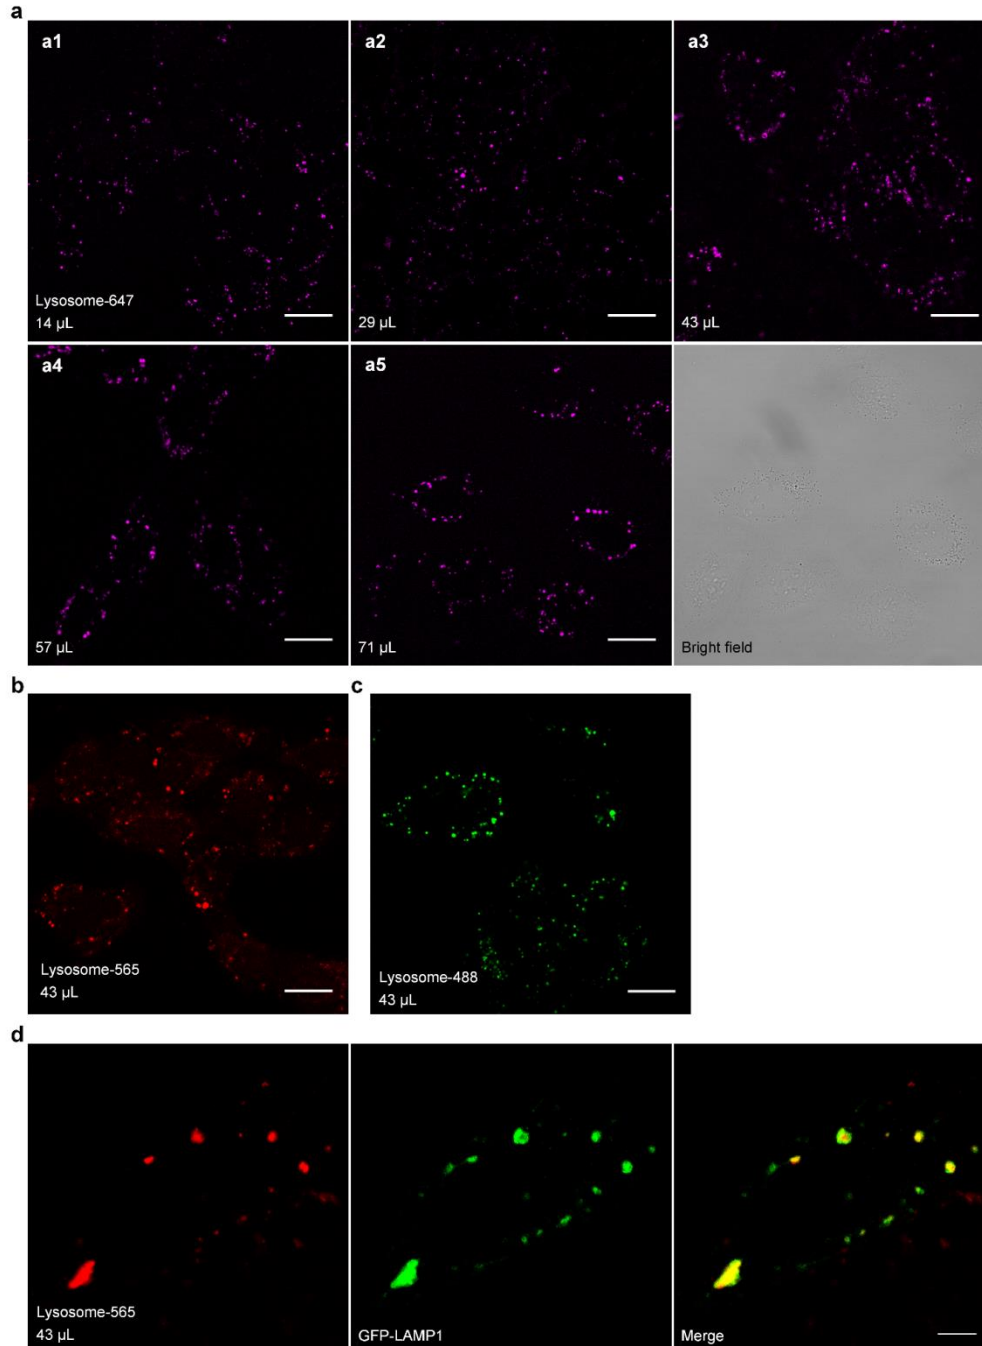

**Supplementary Figure 2.** Confocal microscopy images of live U2OS cells after incubation with (a) Lysosome-647, (b) Lysosome-565 or (c) Lysosome-488 for 30 min before imaging. Solutions of Lysosome-647 at different concentrations were prepared by diluting different volumes [i.e., (a1) 14 μL, (a2) 29 μL, (a3) 43, (a4) 57 μL, or (a5) 71 μL] of the stock solution with PBS to a final volume of 100 μL. Solutions of Lysosome-565 and Lysosome-488 were prepared by diluting 43 μL of the stock solution with PBS to a final volume of 100 μL. (d) A co-localization study employing GFP-LAMP1 as the standard lysosomal marker. Live U2OS cells transiently transfected by GFP-LAMP1 (green) were stained with Lysosome-565 (red, 43 μL) for 30 min, post-incubated for 4 h and imaged by confocal microscope. Scale bars, (a-c) 20 μm, and (d) 5 μm.

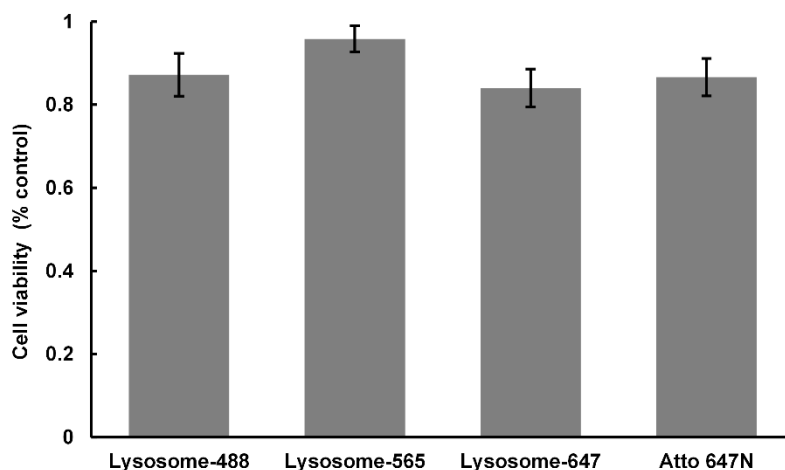

**Supplementary Figure 3.** U2OS cell viabilities after a 30-min incubation with a solution of the probes (Lysosome-488, Lysosome-565, Lysosome-647, or Atto 647N) in PBS at 37 °C. Solutions of the lysosomal probes were prepared by diluting 43  $\mu\text{L}$  of a stock solution with PBS to a final volume of 100  $\mu\text{L}$ . The concentration of Atto 647N is 15  $\mu\text{M}$ . Error bars represent the standard deviations of triplicate experiments.

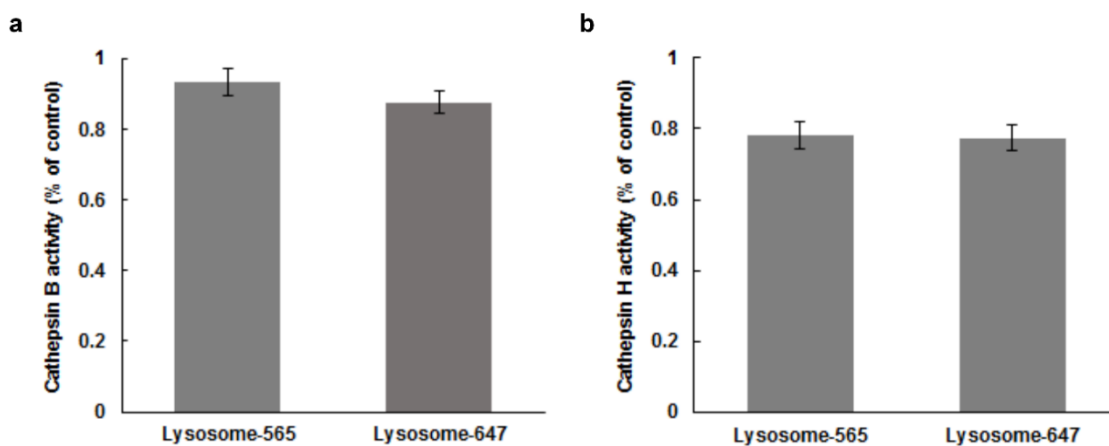

**Supplementary Figure 4.** Activities of cathepsin B (a) and cathepsin H (b) in live U2OS cells after incubation with Lysosome-565 or Lysosome-647 for 30 min. Solutions of the lysosomal probes were prepared by diluting 43  $\mu\text{L}$  of a stock solution with PBS to a final volume of 100  $\mu\text{L}$ . Error bars represent the standard deviations of triplicate experiments.

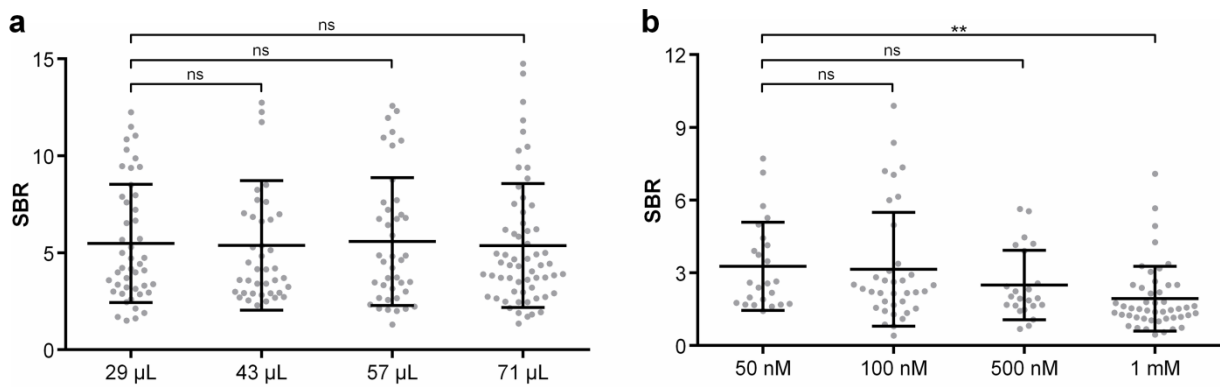

**Supplementary Figure 5.** Average signal (lysosomes) to background (cytosol) ratios (SBR) of (a) Lysosome-565 (SBR from  $n = 46, 40, 41, 61$  areas, respectively) and (b) LysoTracker Red (SBR from  $n = 24, 36, 23, 48$  areas, respectively) at different concentrations (mean  $\pm$  s.d.; ns =  $P > 0.05$ ; \*\* $P < 0.01$ , two-tailed t-test; statistics were performed using SPSS 19.0 software package (IBM Co.)). Solutions of Lysosome-565 at different concentrations were prepared by diluting different volumes [i.e., 29  $\mu\text{L}$ , 43  $\mu\text{L}$ , 57  $\mu\text{L}$ , or 71  $\mu\text{L}$ ] of the stock solution with PBS to a final volume of 100  $\mu\text{L}$ .

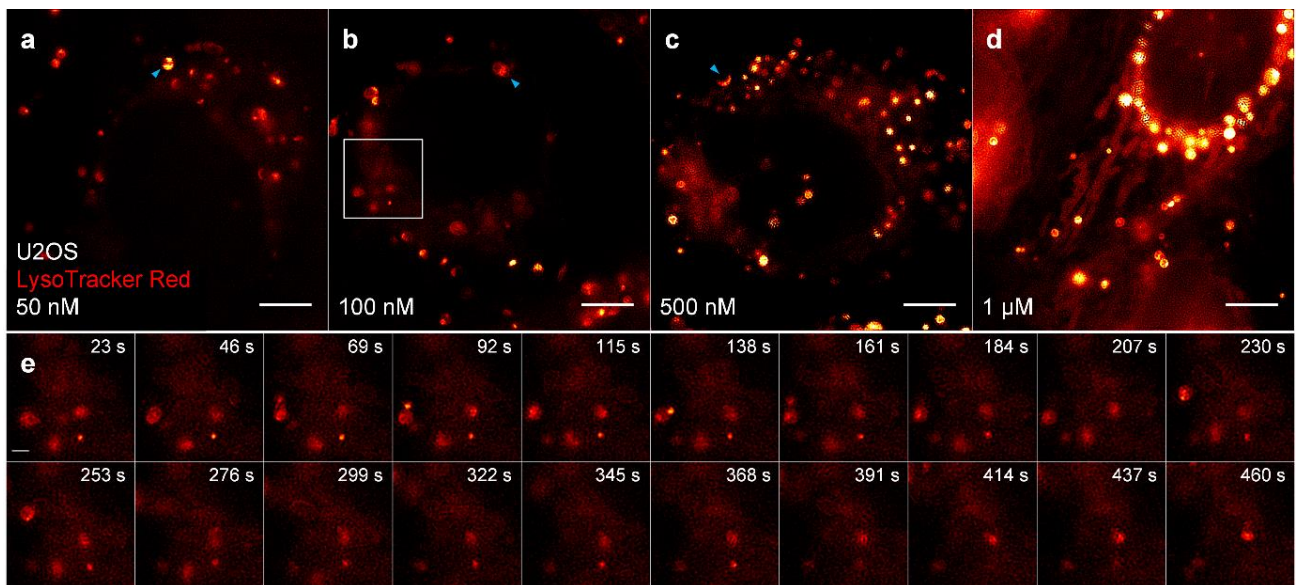

**Supplementary Figure 6.** SIM images of live U2OS cells stained with different concentrations of LysoTracker Red. Live U2OS cells were incubated with (a) 50 nM, (b) 100 nM, (c) 500 nM, or (d) 1  $\mu\text{M}$  LysoTracker Red for 30 min before imaging. (e) Enlarged time-lapse images from the boxed region shown in b, showing a dynamic background of LysoTracker Red. Each SIM frame was acquired over 270 ms (i.e., a raw data exposure time of 30 ms). For time-lapse images, consecutive SIM frames spaced at 1-s intervals were obtained, and representative images of consecutive SIM frames are displayed. Scale bars, (a-d) 5  $\mu\text{m}$ , and (e) 1  $\mu\text{m}$ .

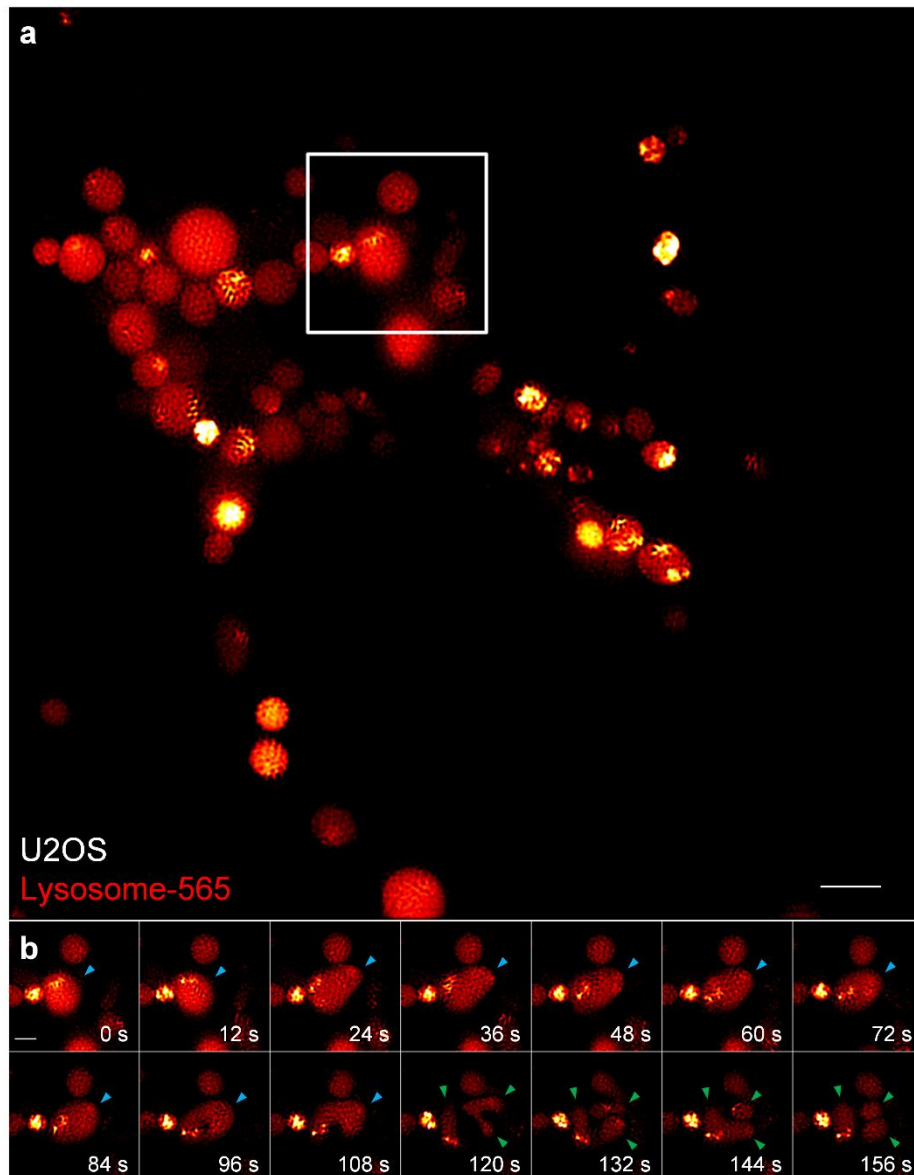

**Supplementary Figure 7.** SIM images of lysosomes exhibiting fission dynamics. **(a)** Live U2OS cells were stained with 43  $\mu$ L of Lysosome-565 for 30 min before imaging. **(b)** Time-lapse images from the boxed region shown in **a**. Each SIM frame was acquired over 270 ms (i.e., a raw data exposure time of 30 ms). For time-lapse images, consecutive SIM frames spaced at 6-s intervals were obtained, and representative images of the consecutive SIM frames are displayed (more frames are shown in Supplementary Video 2). Scale bars, **(a)** 2  $\mu$ m, and **(b)** 1  $\mu$ m.

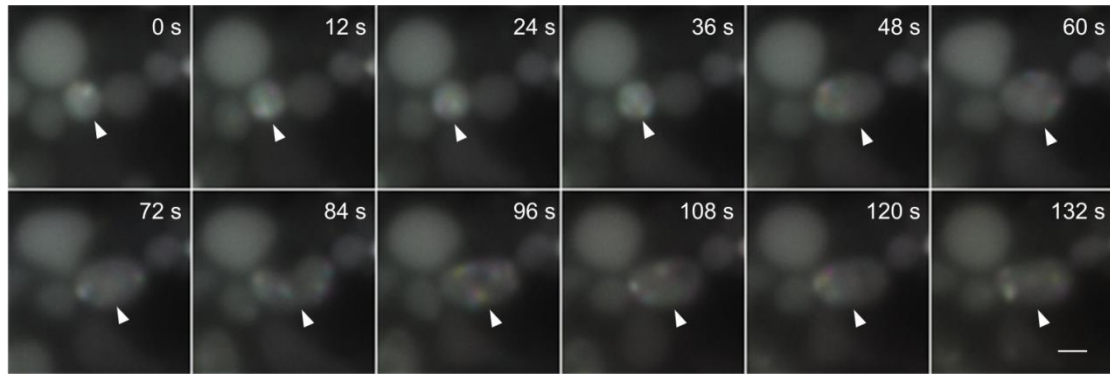

**Supplementary Figure 8.** Motion and illumination variation test of raw data of Figure 1g by using SIMcheck. The round shapes of non-white areas (cyan, magenta, or yellow, identified with white arrowheads) suggest that the differences between angles arising from fast particle motion lead to the hexagonal structures. Scale bars, 1  $\mu\text{m}$ .

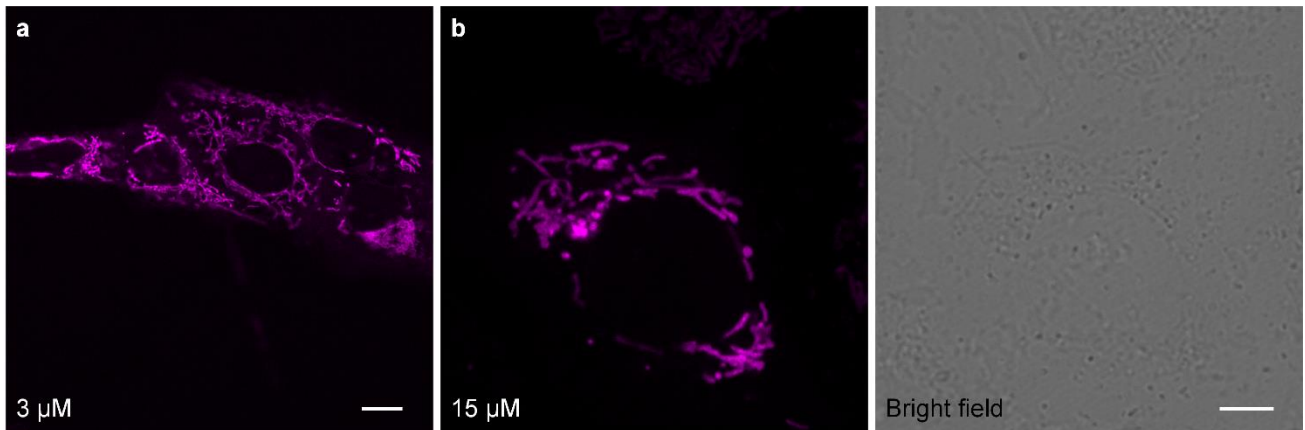

**Supplementary Figure 9.** Confocal microscopy images of live U2OS cells after incubation with (a) 3  $\mu\text{M}$  or (b) 15  $\mu\text{M}$  Atto 647N for 30 min before imaging. Scale bars, (a) 10  $\mu\text{m}$ , and (b) 5  $\mu\text{m}$ .

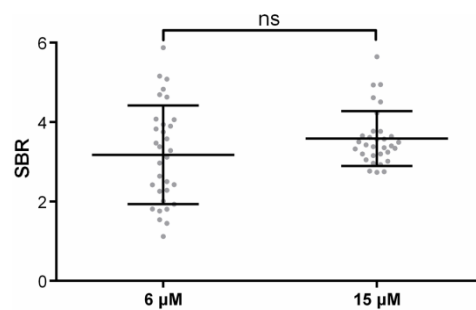

**Supplementary Figure 10.** Average signal (mitochondria) to background (cytosol) ratios (SBR) of Atto 647N at 6  $\mu\text{M}$  (SBR from  $n = 32$  areas) in three SIM images, or 15  $\mu\text{M}$  (SBR from  $n = 32$  areas) in two SIM images (mean  $\pm$  s.d.; ns =  $P > 0.05$ ; two-tailed t-test; statistics were performed using SPSS 19.0 software package (IBM Co.)).

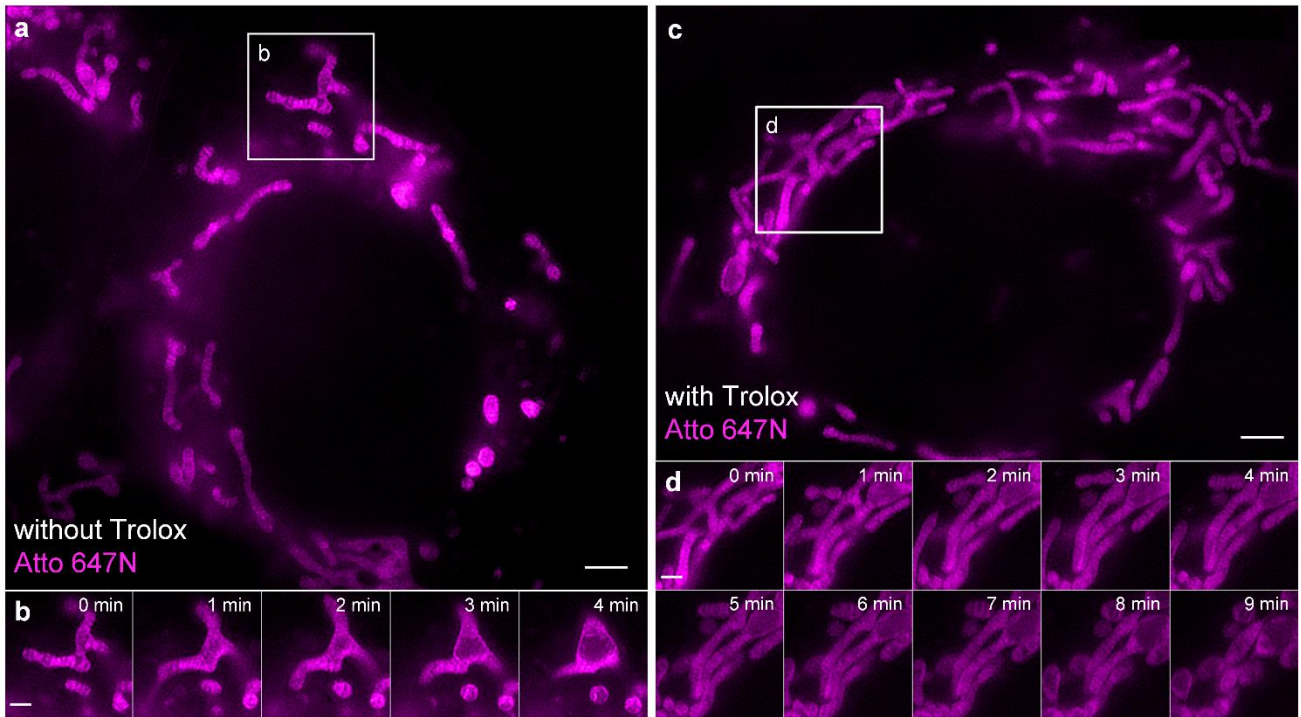

**Supplementary Figure 11.** The effects of Trolox on mitochondrial swelling during SIM experiments. SIM images of live U2OS cells stained with Atto 647N (15  $\mu$ M) (a) without or (c) with the addition of Trolox (1 mM). (b, d) Time-lapse images from the boxed regions shown in a and c, respectively. For time-lapse images, consecutive SIM frames spaced at 1-s intervals were obtained, and representative images of consecutive SIM frames are displayed. Scale bars, (a, c) 5  $\mu$ m, and (b, d) 1  $\mu$ m.

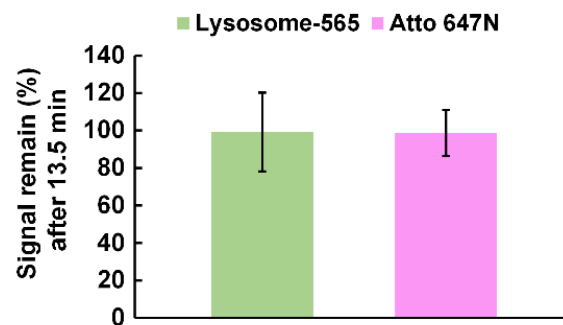

**Supplementary Figure 12.** The percentage of retained fluorescence intensity of Lysosome-565 (from  $n = 22$  lysosomes) and Atto 647N (from  $n = 13$  areas) after 13.5 min of time-lapse dual-color SIM imaging (mean  $\pm$  s.d.). Each SIM frame was acquired over 270 ms (i.e., a raw data exposure time of 30 ms). For the time-lapse images, the time interval between each dual-color SIM image was set to 6 s.

**Supplementary Table 1.** Summary of the optical properties of frequently used fluorescent dyes or proteins.

| Dye                     | Excitation maximum (nm) <sup>a</sup> | Emission maximum (nm) <sup>a</sup> | Extinction (m <sup>-1</sup> cm <sup>-1</sup> ) <sup>b</sup> | Quantum yield <sup>c</sup> | Lifetime (ns) |
|-------------------------|--------------------------------------|------------------------------------|-------------------------------------------------------------|----------------------------|---------------|
| <b>Blue-absorbing</b>   |                                      |                                    |                                                             |                            |               |
| Atto 488                | 501                                  | 523                                | 90,000                                                      | 0.8                        | 4.1           |
| Alexa 488               | 495                                  | 519                                | 71,000                                                      | 0.92                       | 4.1           |
| Fluorescein             | 494                                  | 518                                | 70,000                                                      | 0.79                       | 4             |
| FITC                    | 494                                  | 506                                | 70,000                                                      | 0.8                        | 4.1           |
| BODIPY FL               | 505                                  | 513                                | 80,000                                                      | -                          | 5.7           |
| EGFP                    | 489                                  | 508                                | 55,000                                                      | 0.6                        | -             |
| EYFP                    | 514                                  | 527                                | 84,000                                                      | 0.61                       | -             |
| <b>Yellow-absorbing</b> |                                      |                                    |                                                             |                            |               |
| Cy3                     | 550                                  | 570                                | 136,000                                                     | 0.15                       | 0.3           |
| Cy3.5                   | 581                                  | 596                                | 150,000                                                     | 0.15                       | 0.5           |
| Cy3B                    | 558                                  | 572                                | 130,000                                                     | 0.67                       | 2.8           |
| Alexa 568               | 578                                  | 603                                | 91,300                                                      | 0.69                       | 3.6           |
| Atto 565                | 564                                  | 590                                | 120,000                                                     | 0.92                       | 4             |
| Alexa 555               | 555                                  | 565                                | 150,000                                                     | 0.1                        | 3.6           |
| Atto 550                | 554                                  | 576                                | 120,000                                                     | 0.8                        | 0.3           |
| BODIPY TR               | 588                                  | 617                                | 68,000                                                      | -                          | 5.4           |
| DsRed                   | 558                                  | 583                                | 72,500                                                      | 0.68                       | -             |
| <b>Red-absorbing</b>    |                                      |                                    |                                                             |                            |               |
| Alexa 647               | 650                                  | 665                                | 239,000                                                     | 0.33                       | 1             |
| Atto 647                | 645                                  | 669                                | 120,000                                                     | 0.2                        | 2.4           |
| Atto 647N               | 644                                  | 669                                | 150,000                                                     | 0.65                       | 3.5           |
| Cy5                     | 649                                  | 670                                | 250,000                                                     | 0.28                       | 1             |
| Cy5.5                   | 675                                  | 695                                | 250,000                                                     | 0.28                       | 1             |
| SiR                     | 645                                  | 661                                | 100,000                                                     | 0.39                       | -             |
| <b>NIR-absorbing</b>    |                                      |                                    |                                                             |                            |               |
| DyLight 755             | 755                                  | 776                                | 220,000                                                     | -                          | -             |
| Cy7                     | 747                                  | 776                                | 200,000                                                     | 0.28                       | -             |
| Alexa Fluor 750         | 749                                  | 775                                | 240,000                                                     | 0.12                       | 0.7           |
| Atto 740                | 740                                  | 764                                | 120,000                                                     | 0.1                        | -             |

<sup>a</sup>Excitation and emission peak wavelengths of dye spectra. <sup>b</sup>Extinction coefficients reported by the dye manufacturers. <sup>c</sup>Quantum yields from either the dye manufacturer when reported or from the McNamara 2007 fluorophore data tables. -, values not available from the dye manufacturer or McNamara data tables.



**Supplementary Table 2.** Imaging conditions for SIM experiments.

|                            | Label             | Dosage     | Excitation $\lambda$<br>(nm) | Illumination<br>intensity<br>(W/cm <sup>2</sup> ) | Exposure<br>time per raw<br>image (ms) | Cycle time<br>(Acquisition +<br>resting time)<br>(sec) | Time<br>points |
|----------------------------|-------------------|------------|------------------------------|---------------------------------------------------|----------------------------------------|--------------------------------------------------------|----------------|
| Fig. 1b-c                  | LysoTracker Red   | 50 nM      | 561                          | 5.71                                              | 30                                     | 6                                                      | 95             |
|                            | Lysosome-647      | 43 $\mu$ L | 647                          | 1.43                                              | 30                                     |                                                        |                |
| Fig. 1d(left panel)        | Lysosome-488      | 43 $\mu$ L | 488                          | 2.14                                              | 30                                     | 6                                                      | 99             |
| Fig. 1d(right panel)-e     | Lysosome-565      | 43 $\mu$ L | 561                          | 5.71                                              | 30                                     | 1.15                                                   | over 300       |
| Fig. 1g                    | Lysosome-565      | 43 $\mu$ L | 561                          | 15.00                                             | 30                                     | 6                                                      | 24             |
| Fig. 2a-b                  | MitoTracker Green | 400 nM     | 488                          | 6.43                                              | 30                                     | 6                                                      | 86             |
|                            | Atto 647N         | 15 $\mu$ M | 647                          | 1.43                                              | 30                                     |                                                        |                |
| Fig. 2c(upper panel)       | MitoTracker Green | 400 nM     | 488                          | 6.43                                              | 30                                     | 1.15                                                   | 354            |
| Fig. 2c(lower panel)       | Atto 647N         | 15 $\mu$ M | 647                          | 0.71                                              | 30                                     | 1.15                                                   | 354            |
| Fig. 3a                    | Lysosome-565      | 43 $\mu$ L | 561                          | 3.21                                              | 30                                     | 60                                                     | 31             |
|                            | Atto 647N         | 15 $\mu$ M | 647                          | 0.36                                              | 30                                     |                                                        |                |
| Fig. 3b                    | Lysosome-565      | 43 $\mu$ L | 561                          | 5.71                                              | 30                                     | 6                                                      | 244            |
|                            | Atto 647N         | 15 $\mu$ M | 647                          | 0.71                                              | 30                                     |                                                        |                |
| Fig. 3c-f                  | Lysosome-565      | 43 $\mu$ L | 561                          | 5.71                                              | 30                                     | 6                                                      | 137            |
|                            | Atto 647N         | 15 $\mu$ M | 647                          | 0.71                                              | 30                                     |                                                        |                |
| Fig. 4a(upper panel),b     | Lysosome-565      | 43 $\mu$ L | 561                          | 3.21                                              | 30                                     | 10                                                     | 10             |
|                            | Atto 647N         | 15 $\mu$ M | 647                          | 0.71                                              | 30                                     |                                                        |                |
| Fig. 4a(lower panel)       | Lysosome-565      | 43 $\mu$ L | 561                          | 11.07                                             | 30                                     | 6                                                      | 62             |
|                            | Atto 647N         | 15 $\mu$ M | 647                          | 0.71                                              | 30                                     |                                                        |                |
| Fig. 4c-d                  | Lysosome-565      | 43 $\mu$ L | 561                          | 3.21                                              | 30                                     | 10                                                     | 61             |
|                            | Atto 647N         | 15 $\mu$ M | 647                          | 0.71                                              | 30                                     |                                                        |                |
| Supplementary Fig. 6       | LysoTracker Red   | 50-1000 nM | 561                          | 5.71                                              | 30                                     | 1.15                                                   | over 300       |
| Supplementary Fig. 7 and 8 | Lysosome-565      | 43 $\mu$ L | 561                          | 15.00                                             | 30                                     | 6                                                      | 28             |
| Supplementary Fig. 11a-b   | Atto 647N         | 15 $\mu$ L | 647                          | 1.43                                              | 30                                     | 1.15                                                   | 283            |
| Supplementary Fig. 11c-d   | Atto 647N         | 15 $\mu$ L | 647                          | 1.43                                              | 30                                     | 1.15                                                   | 602            |

## Supplementary Note 1. Design of the lysosomal probes.

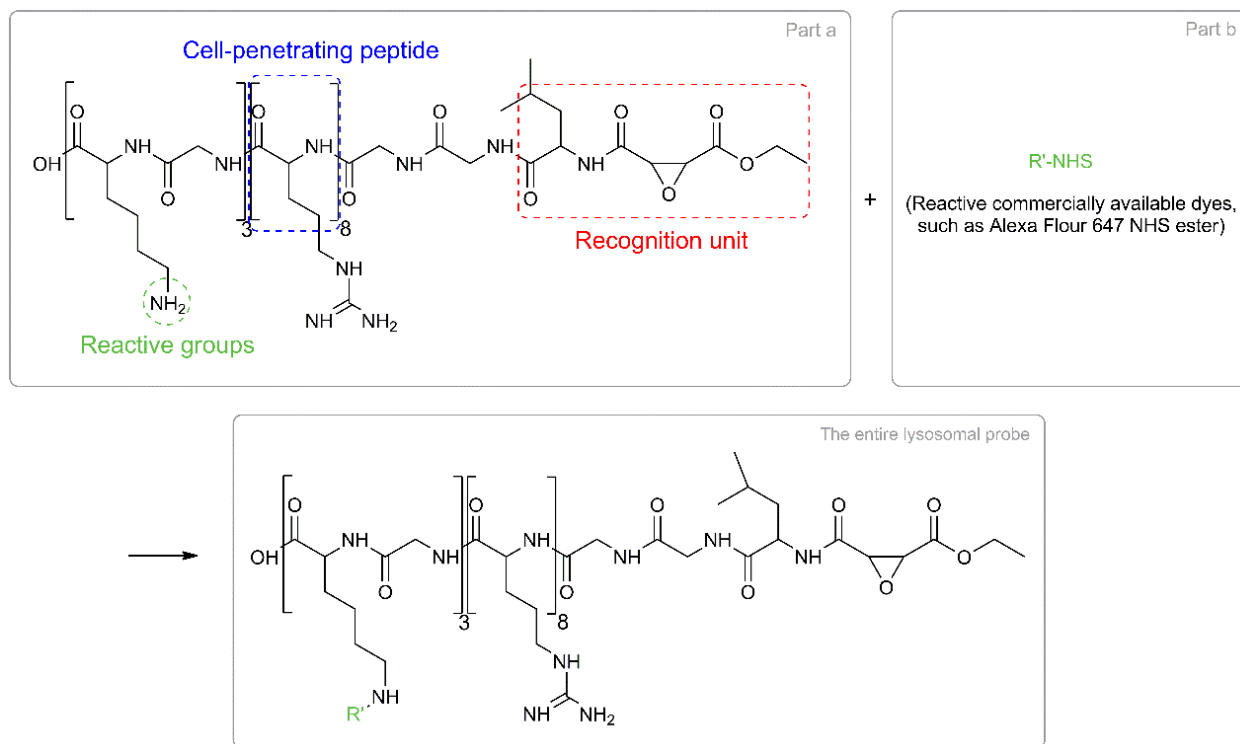

## Supplementary Note 2. Synthesis of the peptide part of the lysosomal probes.

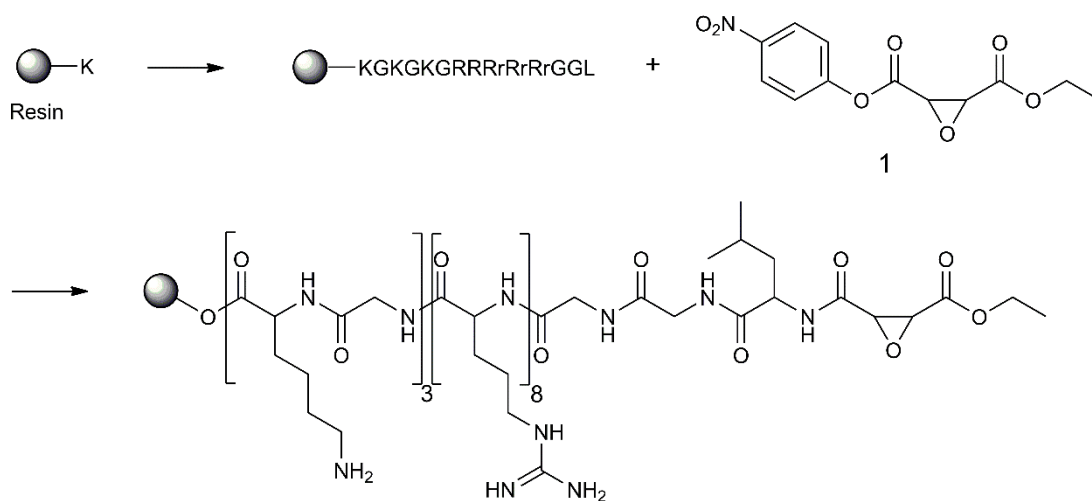

Compound 1 was synthesized as previously reported<sup>1</sup>, and the peptide part of the lysosomal probes was synthesized using 9-fluorenylmethoxycarbonyl (Fmoc) solid-phase peptide synthesis on 2-chlorotrityl chloride resin with standard deprotection and coupling procedures<sup>2-3</sup>. The final product was purified by preparative HPLC to reach a purity > 95%, and the appropriate mass was confirmed by EI-MS spectrometry (Supplementary Fig. 1).

## Supplementary References

1. Chehade, K. A. H. *et al.* An improved preparation of the activity-based probe JPM-OEt and in situ applications. *Synthesis* **2**, 240-244 (2005).
2. Fan, F. *et al.* Labeling lysosomes and tracking lysosome-dependent apoptosis with a cell-permeable activity-based probe. *Bioconjug. Chem.* **23**, 1309-1317 (2012).
3. Fan, F. *et al.* Protein profiling of active cysteine cathepsins in living cells using an activity-based probe containing a cell-penetrating peptide. *J. Proteome Res.* **11**, 5763-5772 (2012).
